# Supplementary material for: Comparative Study of the Mode of Action of Clinically Approved Platinum-Based Chemotherapeutics
Source: PubMed Central journal article supplement (PMC7555145; doi:10.3390/ijms21186928), 2020-09-21
Supplement: ijms-21-06928-s001.pdf [file ijms-21-06928-s001.pdf]

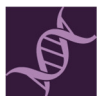

## Oxidative stress response

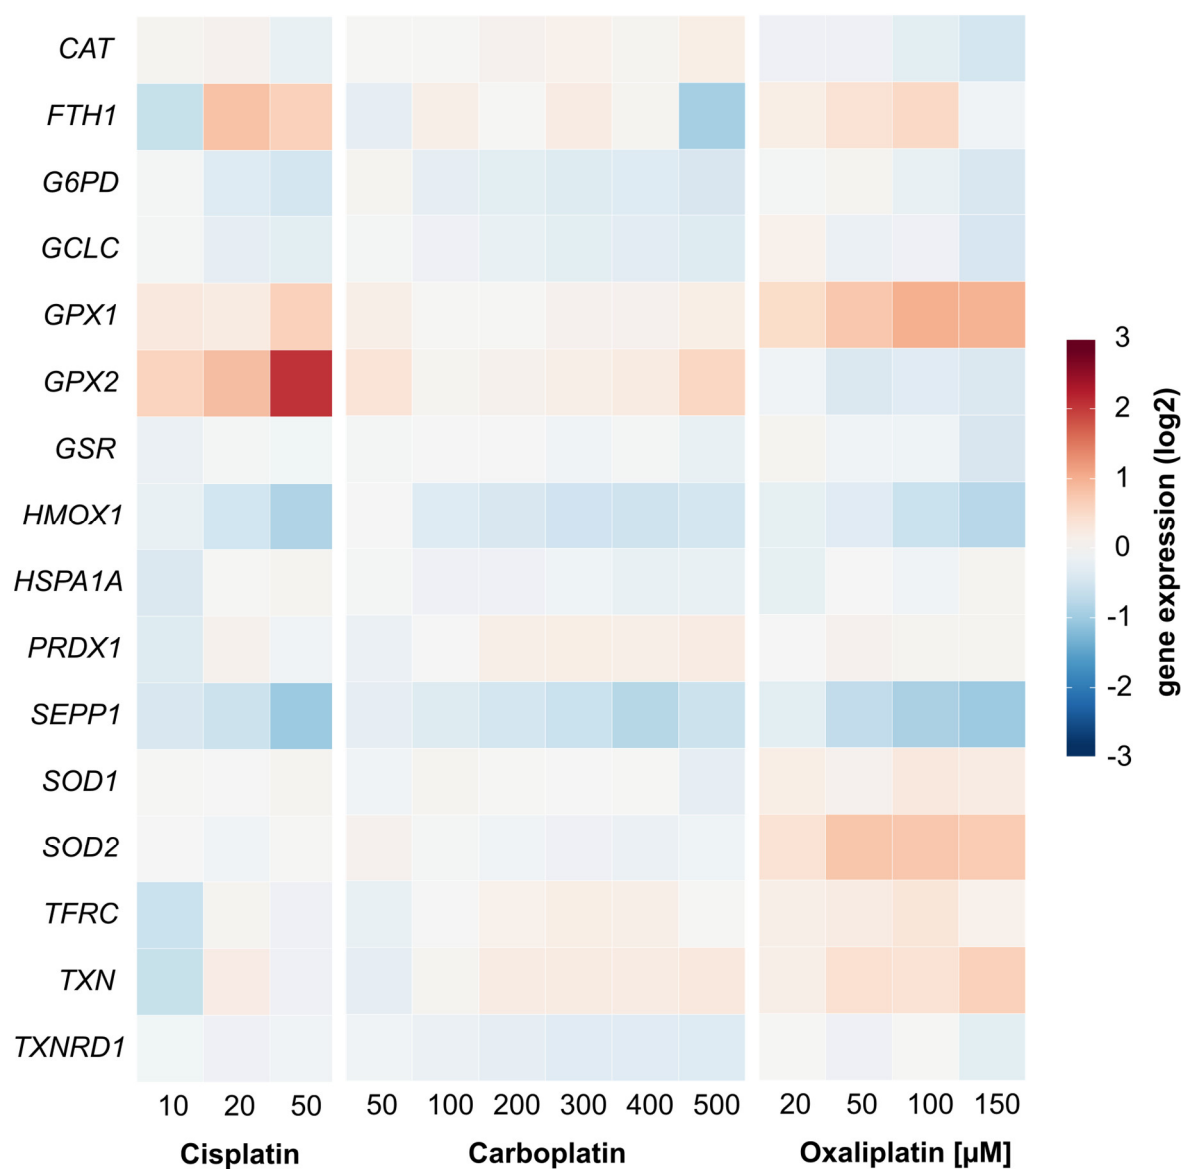

**Supplementary figure 1:** Gene expression analysis of (oxidative) stress related genes after treatment of A498 cells with cisplatin, carboplatin or oxaliplatin. Cells were treated for 1 h with cisplatin (10, 20, 50 μM), carboplatin (50, 100, 200, 300, 400, 500 μM) or oxaliplatin (20, 50, 100, 150 μM). This was followed by a post cultivation of 24 h. Afterwards gene expression was determined via high-throughput RT-qPCR. Shown are the log<sub>2</sub> mean values of three independent experiments normalized to the untreated control whereby the control equals 0. The data for cisplatin are taken from [8].
